# Supplementary material for: Reduction of Au3+ to distinctive Au-based materials by amphiphilic sodium dodecylbenzenesulfonate
Source: Royal Society of Chemistry journal article supplement (doi:10.1039/d0ra07066a), 2020-01-01
Supplement: d0ra07066a1.pdf [file d0ra07066a1.pdf]

# Supporting Information for

## Reduction of Au<sup>3+</sup> to Distinctive Au-based Materials by Amphiphilic Sodium Dodecylbenzenesulfonate

Yao-Tsung Hsu<sup>ab, ‡</sup>, Hung-Fei Chen<sup>b, ‡</sup>, Wei-Jhih Lin<sup>c</sup>, Jungshan Chang<sup>\*a</sup>, and Fu-Der Mai<sup>\*ab</sup>

<sup>a</sup>Graduate Institute of Medical Sciences, College of Medicine, Taipei Medical University, Taipei 11031, Taiwan.

<sup>b</sup>Department of Biochemistry and Molecular Cell Biology, School of Medicine, College of Medicine, Taipei Medical University, Taipei 11031, Taiwan.

<sup>c</sup>Department of Forensic Science Department, Central Police University, No.56, Shujen Road, Taoyuan City 33304, Taiwan.

## Experimental Section

*Materials and characterizations:* HAuCl<sub>4</sub>, SDBS, NaBH<sub>4</sub>, P(Ph)<sub>3</sub>, and graphite were purchased from Sigma. TEM experiments were conducted using HT-7700 (Hitachi) under 80 keV. SEM images were recorded using a Nova<sup>TM</sup> NanoSEM (FEI) operated at a primary energy of 10 keV. UV-visible measurement was carried out by Spark 10M (Tecan).

*Measurements of CMC:* Electrical conductivities of the SDBS solution with different concentrations were measured under 90 °C using a conventional electricity meter. Conductivities- concentrations plots then graphed, and apparent changes, which were corresponded to CMC, could be estimated at 0.0813 wt% SDBS. The experimental results were in accordance with the extrapolation of the literature.<sup>31</sup>

*Size-controlled synthesis of AuNPs:* For the optimal condition, 100 mL SDBS solutions with 0.03 (below CMC), 0.1, 0.15, 0.2, 1.0 (above CMC) wt% SDBS were prepared and the temperature was raised to 90 °C. Next, 0.0086 mmol HAuCl<sub>4</sub> was added into the solutions (SDBS were 10 equiv for 0.03 wt%, 30 equiv for 0.1 wt%, 45 equiv for 0.15 wt%, 60 equiv for 0.2 wt%, and 300 equiv for SDBS solution). During reactions, the 0.03 wt% SDBS group turned purple with dark brown suspension, 0.1 wt% SDBS group turned violet, 0.15 wt% SDBS group turned violet red, and 0.2 wt% as well as 1.0 wt% SDBS groups turned red. The reaction periods were 20 minutes for

all groups. 30-minute iced baths were subsequently applied and all groups were stored at 4 °C for further characterizations. Other conditions are noted in Table S1.

*Synthesis of AuNCs:* 30 mg P(Ph)<sub>3</sub> (10 equiv with respect to HAuCl<sub>4</sub>) was added to 1.0 wt% SDBS solutions. Similarly, the temperature was raised to 90 °C, 0.0086 mmol HAuCl<sub>4</sub> was added into the solutions, and the reaction periods were 20 minutes. The solutions became transparent, showing that Au<sup>+</sup> complex has formed. 30-minute iced bath was subsequently applied until the solution reached the room temperature. Excess NaBH<sub>4</sub> was then added into as-prepared Au<sup>+</sup> complex solution. The solution became apple juice colour immediately, and AuNCs were synthesized and stored at 4 °C for further characterizations.

*Synthesis of AuNPs/graphene composite:* Graphene was synthesized via sonication. Briefly, 0.3 g graphite was dispersed in 100 mL 0.1 wt% SDBS solution and sonicated for 2 hours. A 2000 rpm centrifugation (LMC-3000, Biosan) was applied to separate un-exfoliated graphite for 15 minutes and the black supernatant was collected. 0.0086 mmol HAuCl<sub>4</sub> was then added into the as-prepared graphene solution, and the reagents reacted under 90 °C for 30 minutes. 30-minute iced bath was subsequently applied until the solution reached the room temperature. Next, AuNPs/graphene composite was collected by vacuum filtration with a polyamide membrane (0.2 μm, Whatman<sup>®</sup>) and dried under 70 °C overnight in a conventional oven.

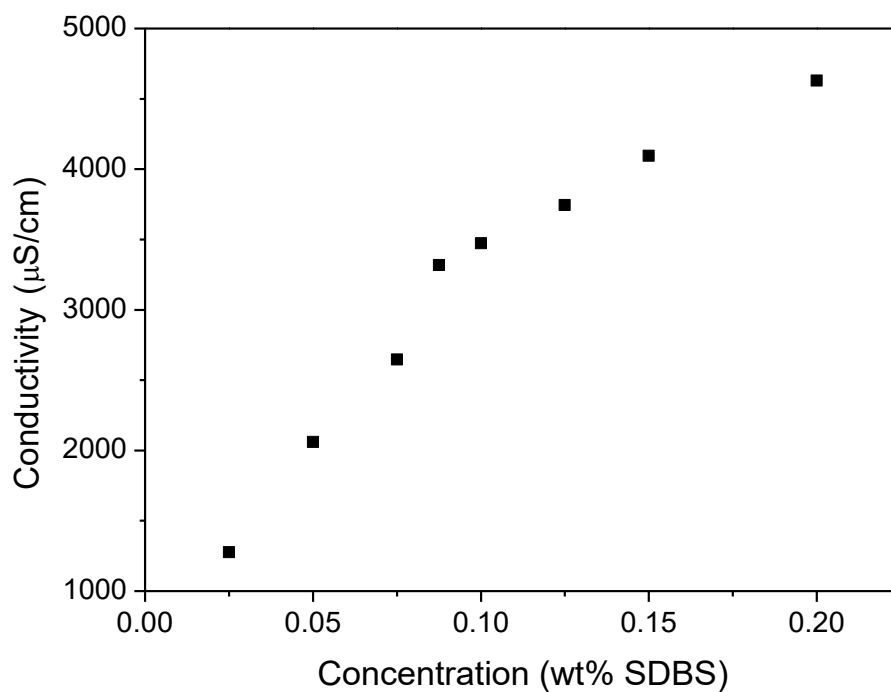

Figure S1. Conductivity-concentration plot for CMC investigation of SDBS-water solution at 90 °C. Apparent change can be found between 0.75 and 0.0875 wt% SDBS. Thus, 0.0813 wt% SDBS, the average number, was used as CMC for SDBS-water solution at 90 °C.

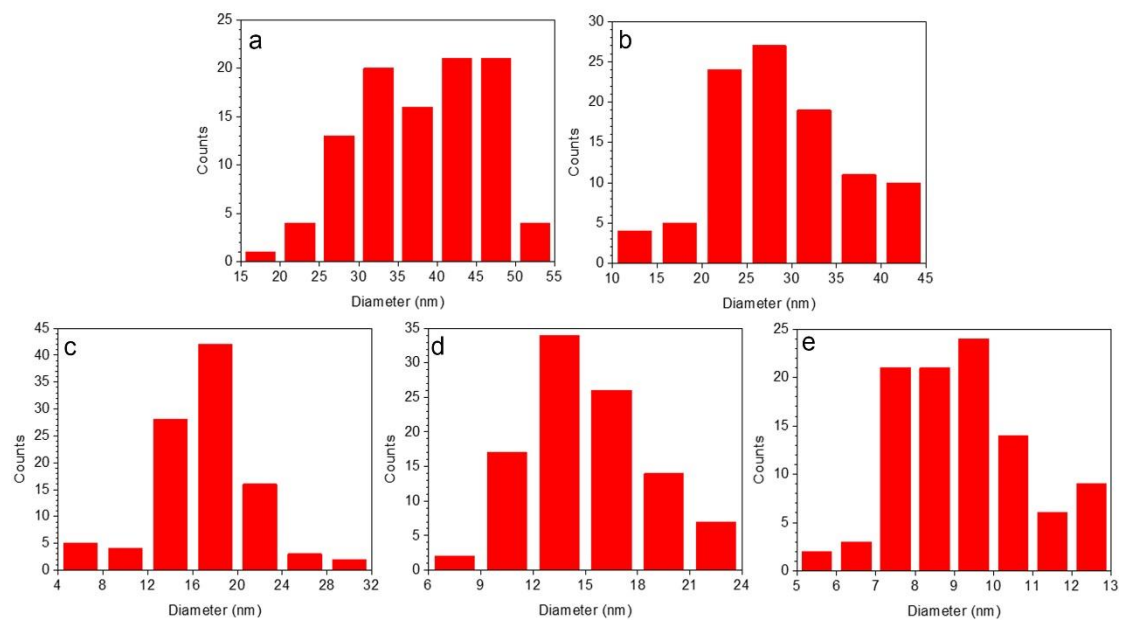

Figure S2. Histogram of the size of AuNPs synthesized under (a) 0.03 (b) 0.1 (c) 0.15 (d) 0.2 (e) 1.0 wt% SDBS.

Table S1. AuNPs prepared under different conditions.

| Condition                          | Size control                  | Speed               |
|------------------------------------|-------------------------------|---------------------|
| 90 °C, 0.086 mM HAuCl <sub>4</sub> | good                          | fast (20 minutes)   |
| 60 °C, 0.086 mM HAuCl <sub>4</sub> | poor                          | medium (60 minutes) |
| 30 °C, 0.086 mM HAuCl <sub>4</sub> | poor                          | slow (24 hours)     |
| 90 °C, 0.86 mM HAuCl <sub>4</sub>  | poor (formation of bulk gold) | fast (20 minutes)   |

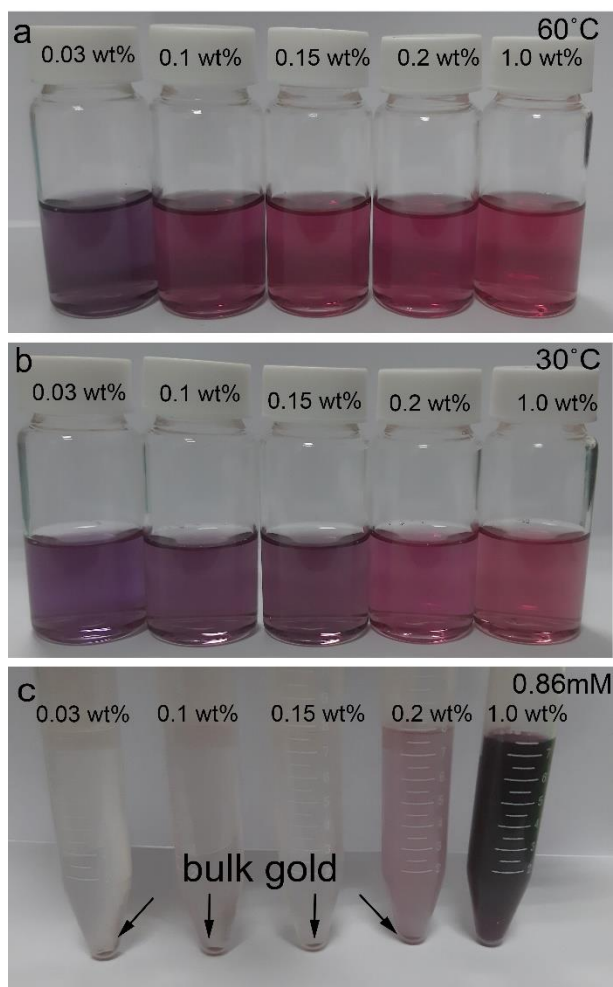

Figure S3. Optical pictures of different conditions showing inferior synthetic results. (a) The condition of lower temperature 60 °C. (b) The condition of even lower temperature 30 °C. (c) The condition of higher concentration of precursors (0.86 mM). Bulk gold will form. For 1.0 wt% SDBS, dark purple nanoparticles will form.

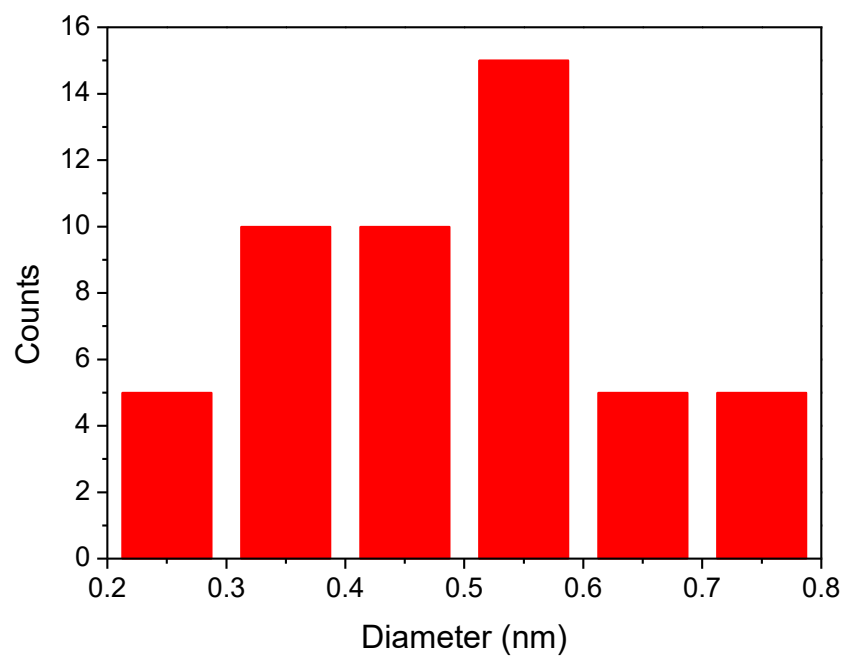

Figure S4. The histogram of the size of AuNCs.
